# Supplementary material for: A Practical Synthesis of the PDE4 Inhibitor, KW-4490
Source: Atypon-hosted journal article supplement (doi:10.1021/op1001287), 2010-07-08

# Supporting information for

## A Practical Synthesis of the PDE4 inhibitor, KW-4490

Arata Yanagisawa,<sup>\*,†</sup> Koichiro Nishimura, Kyoji Ando, Tetsuya Nezu, Ayako Maki,  
Sachiko Kato, Wakako Tamaki, Eiichiro Imai, and Shin-ichiro Mohri

*Chemical Process Research and Development Laboratories, Kyowa Hakko Kirin Co., Ltd., 1-1-53, Takasu-cho, Sakai-ku, Sakai, Osaka 590-8554, Japan. † Current address: Medicinal Chemistry Research Laboratories, Fuji Research Park, 1188 Shimotogari, Nagaizumi-cho, Sunto-gun, Shizuoka 411-8731 Japan*  
*arata.yanagisawa@kyowa-kirin.co.jp*

### Table of contents

1. General information
2. HPLC and GC methods
3. <sup>1</sup>H and <sup>13</sup>C NMR spectra of new compounds

### 1. General information

<sup>1</sup>H NMR spectra were obtained on a JEOL JNM-LA300 spectrometer (300 MHz) or Bruker AVANCE 500 spectrometer (500 MHz). Proton-decoupled <sup>13</sup>C NMR spectra were obtained on a JEOL JNM-LA300 spectrometer (75 MHz) or Bruker AVANCE 500 spectrometer (125 MHz).

### 2. HPLC and GC methods

HPLC analysis were performed on a Hitachi L-4000 system.

Column: YMC-Pack, C8, 150×60 mm; λ = 230 nm; temperature: 35°C; eluant: phosphate buffer\* : methanol = 38 : 62 (\*0.01 mol of K<sub>2</sub>HPO<sub>4</sub> and 0.01 mol of KH<sub>2</sub>PO<sub>4</sub> were dissolved in 1L of water, then pH was adjusted to 3 by H<sub>3</sub>PO<sub>4</sub>); flow rate: 1mL/min. *t*<sub>R</sub>: **11** = 4.2 min; **15** = 4.8 min; **1** (KW-4490) = 5.0 min; **16** = 5.6 min; **3** = 8.7 min; **18** = 10.5 min; **cis-8** = 10.6 min; **trans-8** = 12.4 min; **9** = 20.3 min; **19** = 21.0 min; diphenyl (internal standard) = 23.5 min.

GC analyses were performed on a Shimadzu GC-14A.

Column: TC-5 30 m×0.25 mm; detection: FID (Flame ionization detector); carrier gas: helium; carrier gas pressure: 1.5 kg/cm<sup>2</sup>; injection temp: 250°C; detection temp: 260°C; flow late: split 60.0 mL/min; time program: 5 min at 100°C, 5.0°C/min to 250°C, 210 min at 50°C.

*t*<sub>R</sub>: **5** 11.5 = min; **12** = 14.9 min.

### 3. $^1\text{H}$ and $^{13}\text{C}$ NMR spectra of new compounds

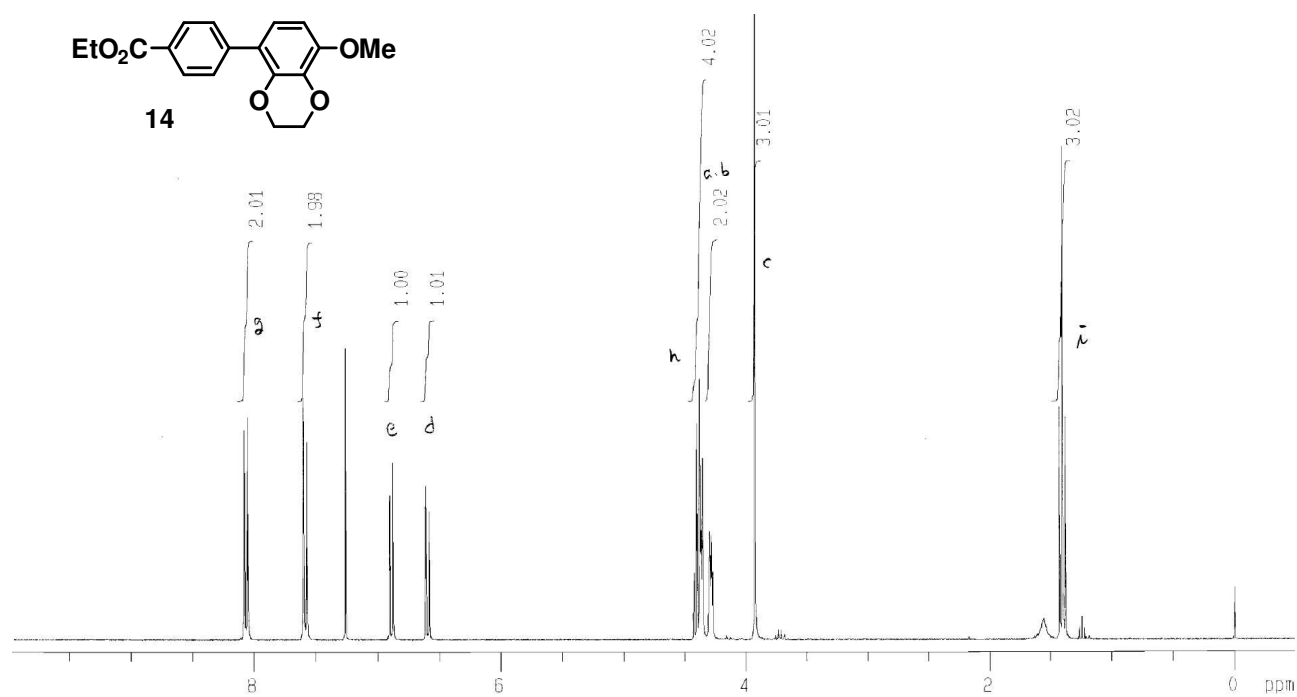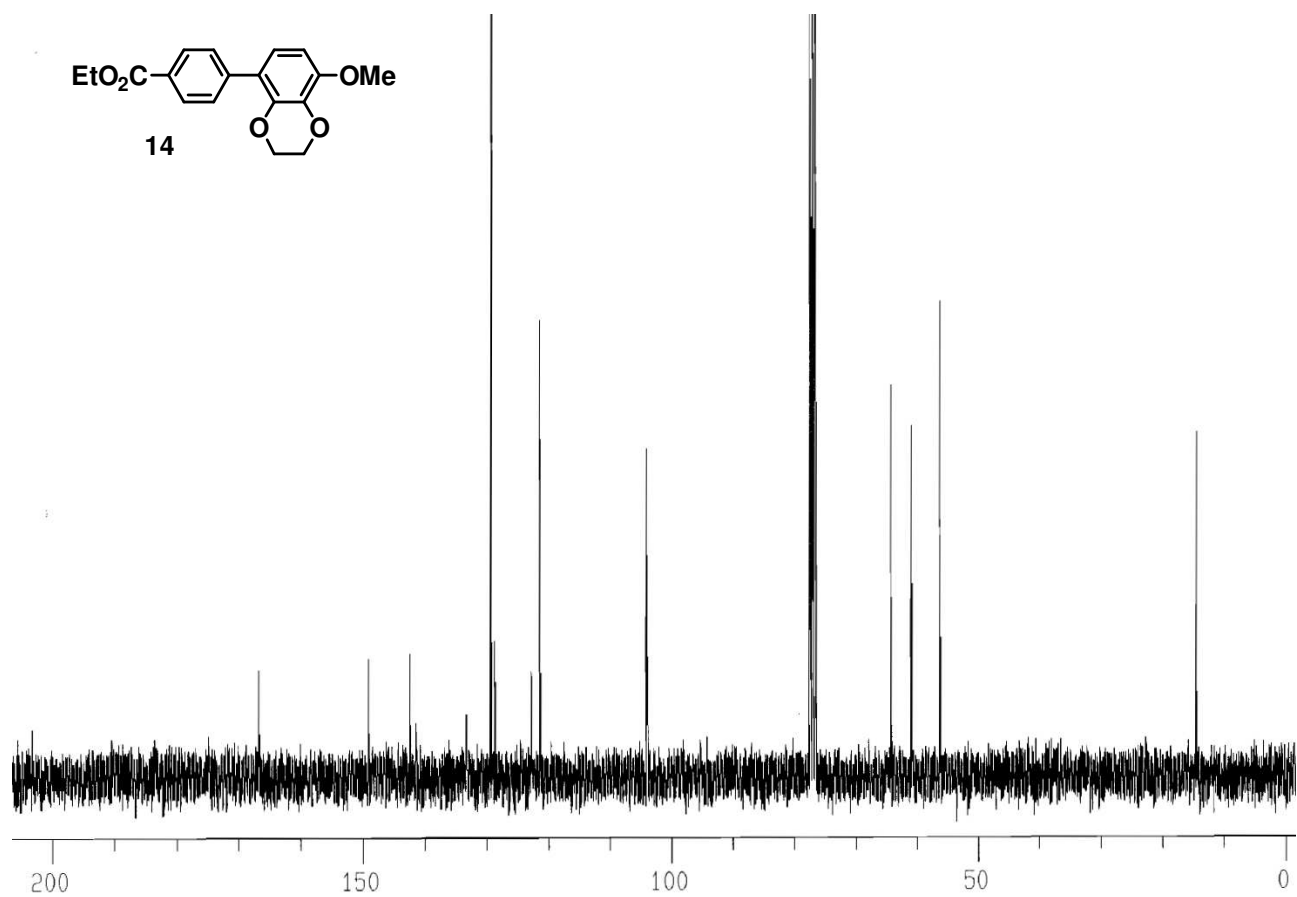

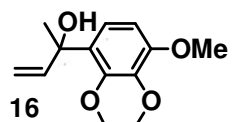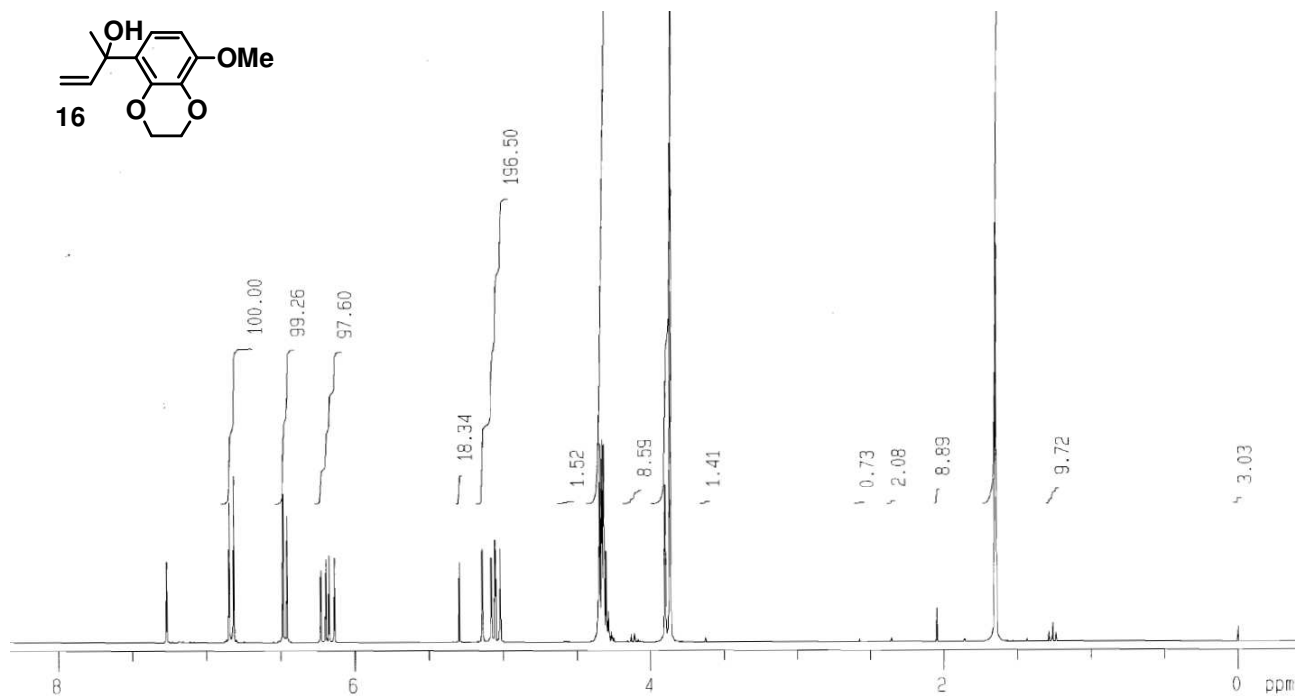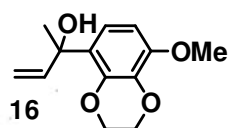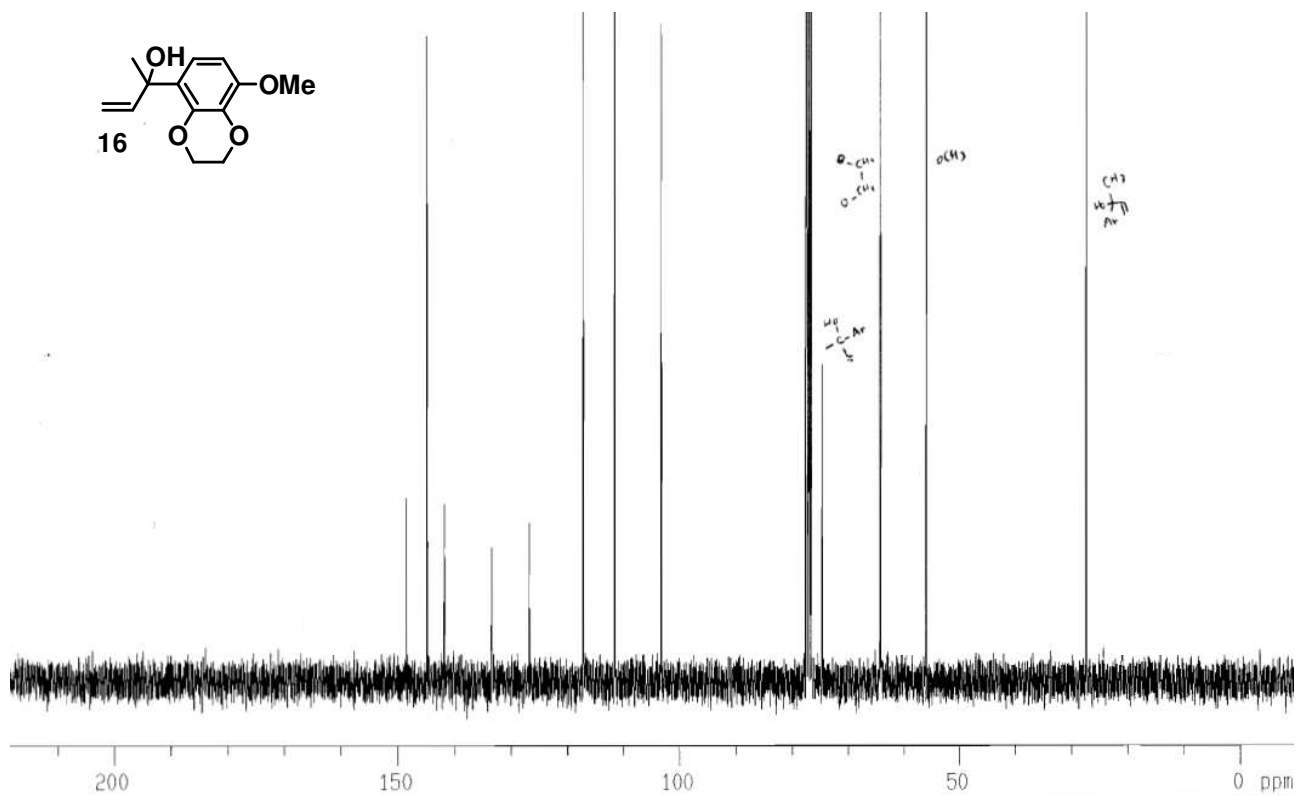

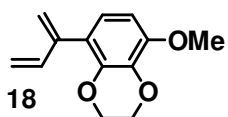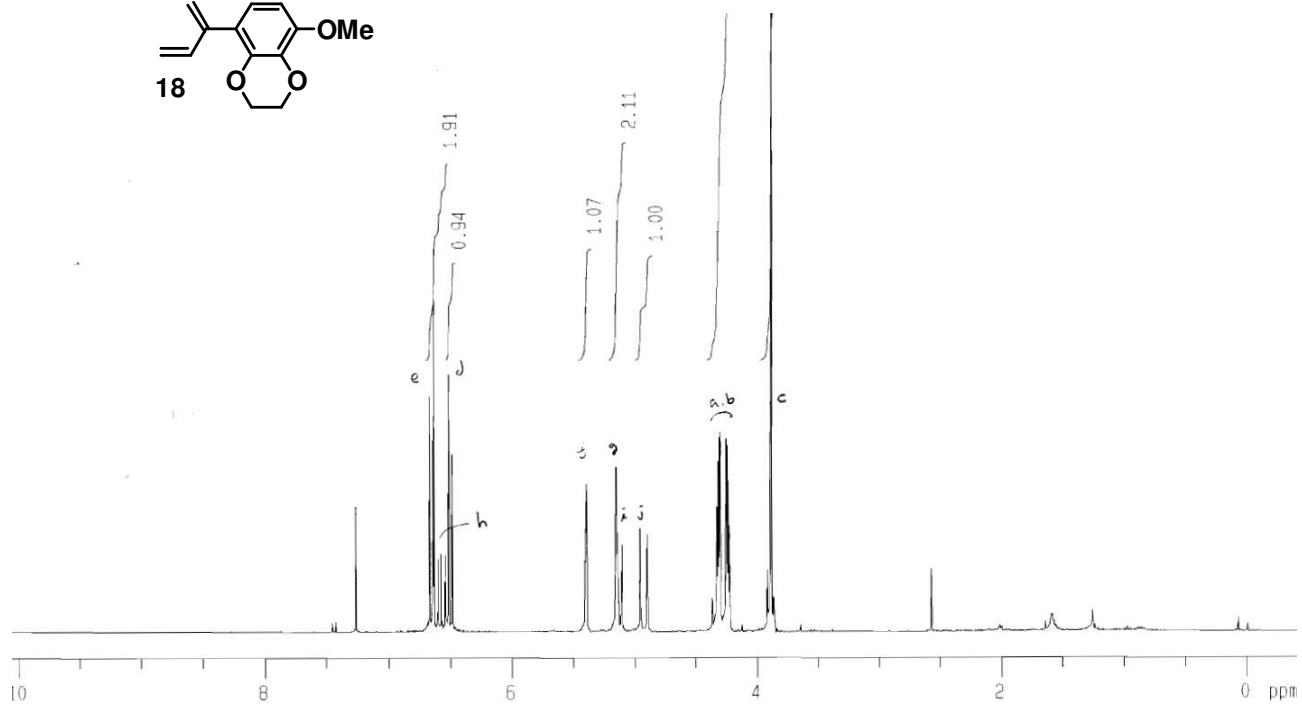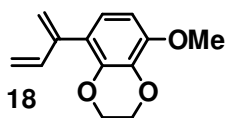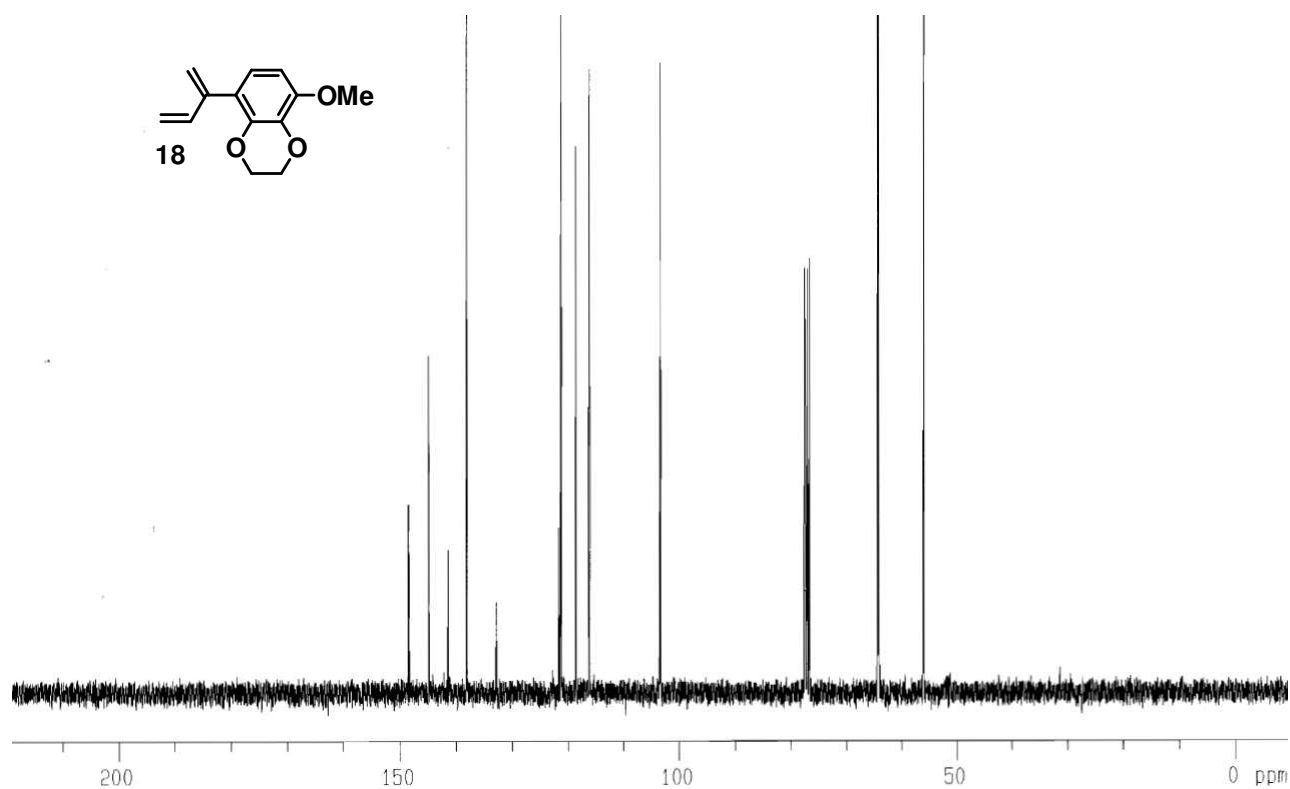

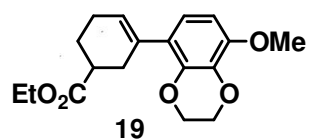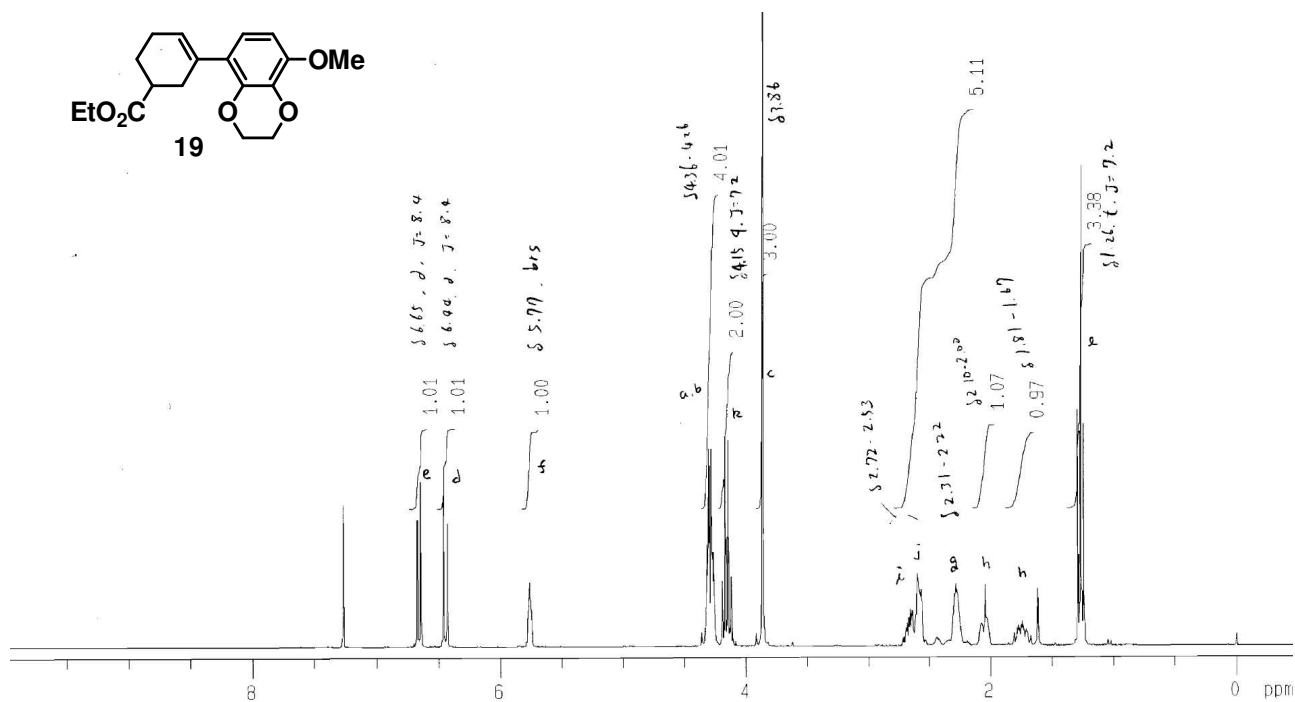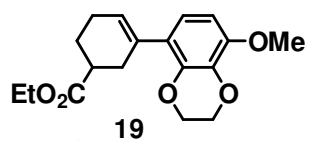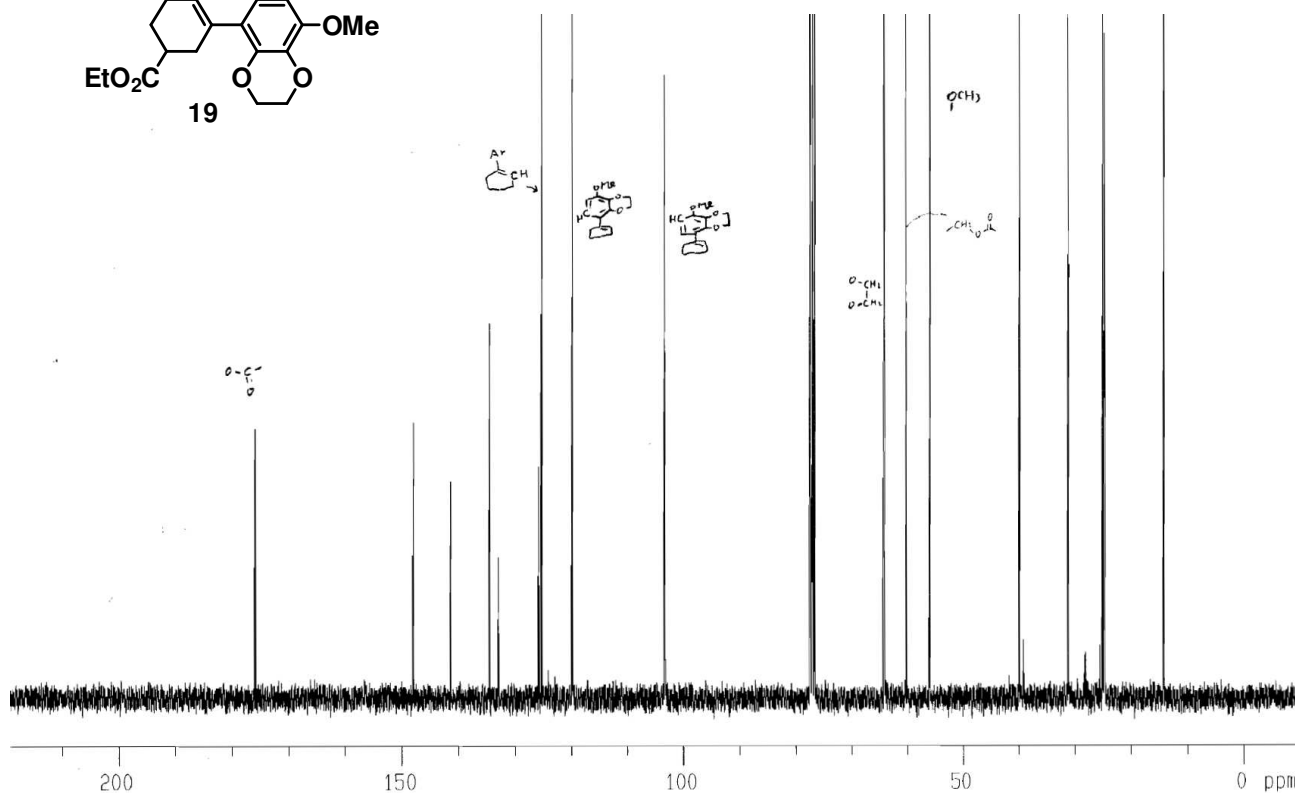

Supplement: op1001287_si_001.pdf [file op1001287_si_001.pdf]
